# Supplementary material for: Dynamic Perception of Well-Learned Perceptual Objects
Source: Springer Nature journal article supplement (doi:10.1007/s42113-021-00107-0), 2021-05-03

Dynamic Perception of Well-Learned Perceptual Objects  
Computational Brain and Behavior  
Samuel M. Harding<sup>1</sup>, Denis Cousineau, Richard M. Shiffrin

### **Online Resources**

1. Samuel M. Harding  
Department of Psychology, Syracuse University, Syracuse NY, USA  
smhardin@syr.edu

## Online Resource 1

Empirical mean accuracy and median response times for three participants. Values correspond to those reported in Figures 3 and 4 in the main text.

| <b>Participant C</b> | <b>Accuracy</b> | <b>Median Response Time</b> |
|----------------------|-----------------|-----------------------------|
| SIM_T                | 0.9762          | 406                         |
| SIM_F                | 0.9817          | 447                         |
| SEQ_Target_16first   | 0.9964          | 412                         |
| SEQ_Target_16last    | 0.9785          | 450                         |
| SEQ_Foil_16first     | 0.9642          | 503                         |
| SEQ_Foil_16last      | 0.9928          | 465                         |
| SEQ_Target_33first   | 0.9928          | 424                         |
| SEQ_Target_33last    | 0.9606          | 494                         |
| SEQ_Foil_33first     | 0.9211          | 532                         |
| SEQ_Foil_33last      | 0.9928          | 483                         |
| SEQ_Target_50first   | 0.9892          | 444                         |
| SEQ_Target_50last    | 0.8817          | 540                         |
| SEQ_Foil_50first     | 0.9427          | 564                         |
| SEQ_Foil_50last      | 0.9892          | 497                         |

| <b>Participant D</b> | <b>Accuracy</b> | <b>Median Response Time</b> |
|----------------------|-----------------|-----------------------------|
| SIM_T                | 0.9550          | 361                         |
| SIM_F                | 0.9856          | 371                         |
| SEQ_Target_16first   | 1.0000          | 380                         |
| SEQ_Target_16last    | 0.9444          | 442                         |
| SEQ_Foil_16first     | 0.9242          | 463                         |
| SEQ_Foil_16last      | 0.9899          | 405                         |
| SEQ_Target_33first   | 0.9899          | 402                         |
| SEQ_Target_33last    | 0.9343          | 489                         |
| SEQ_Foil_33first     | 0.9141          | 488                         |
| SEQ_Foil_33last      | 0.9848          | 438                         |
| SEQ_Target_50first   | 0.9949          | 431                         |
| SEQ_Target_50last    | 0.8939          | 543                         |
| SEQ_Foil_50first     | 0.8788          | 523                         |
| SEQ_Foil_50last      | 1.0000          | 459                         |

| <b>Participant A</b> | <b>Accuracy</b> | <b>Median Response Time</b> |
|----------------------|-----------------|-----------------------------|
| SIM_T                | 0.9780          | 412                         |
| SIM_F                | 0.9933          | 401                         |
| SEQ_Target_16first   | 0.9929          | 439                         |
| SEQ_Target_16last    | 0.9823          | 455                         |
| SEQ_Foil_16first     | 0.9894          | 462                         |
| SEQ_Foil_16last      | 1.0000          | 440                         |
| SEQ_Target_33first   | 0.9929          | 485                         |
| SEQ_Target_33last    | 0.9716          | 507                         |
| SEQ_Foil_33first     | 0.9929          | 500                         |
| SEQ_Foil_33last      | 0.9965          | 467                         |
| SEQ_Target_50first   | 0.9965          | 530                         |
| SEQ_Target_50last    | 0.9681          | 556                         |
| SEQ_Foil_50first     | 0.9929          | 527                         |
| SEQ_Foil_50last      | 1.0000          | 489                         |

## Online Resource 2

Evaluating model fits against empirical response time distributions. In each of the three following figures, the empirical response time distributions are plotted for each of the 14 conditions in the experiment; each figure shows data for a different participant (as indicated in the top-right corner of each figure). Empirical RT distributions for correct responses are plotted as a black solid line and fitted model performance is overlaid in a red dashed line. Conditions are labeled within the top of each figure.

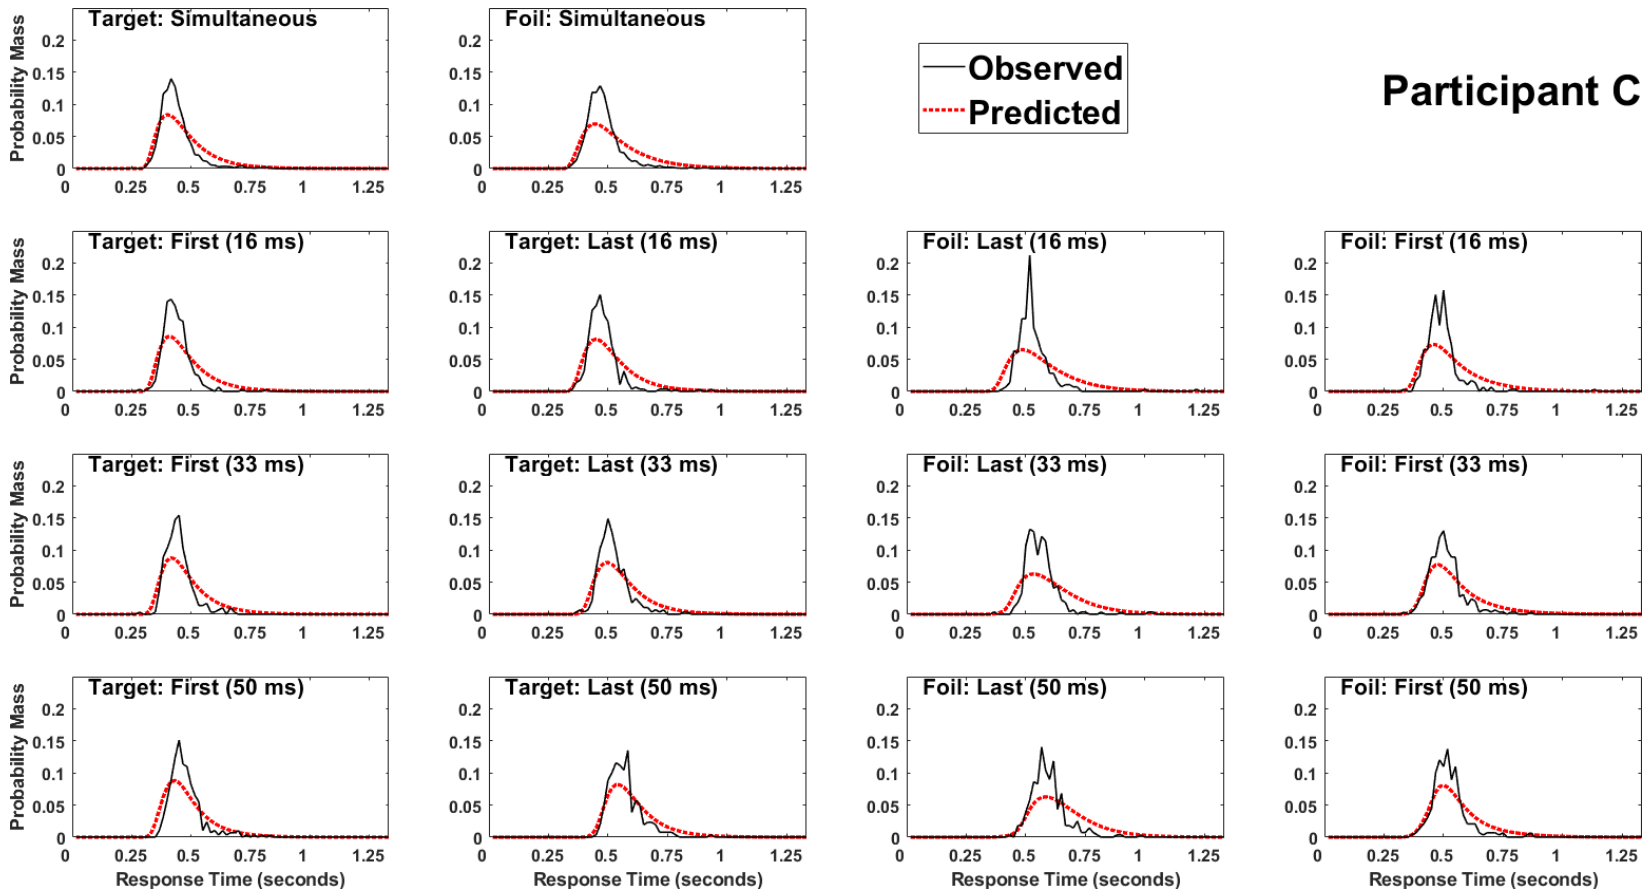

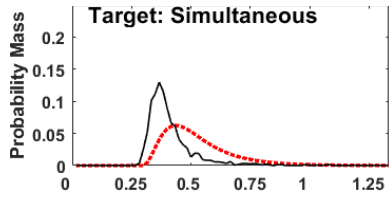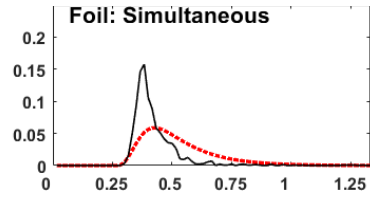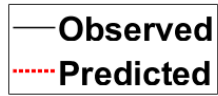

**Participant D**

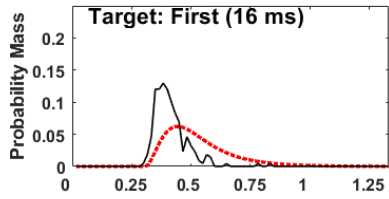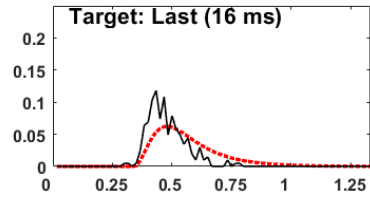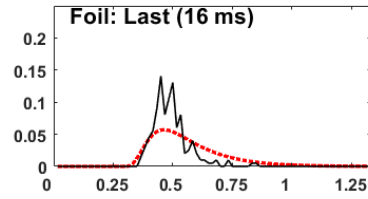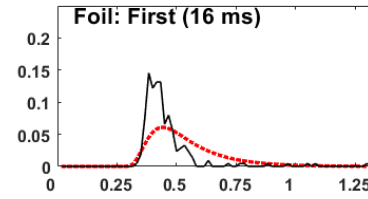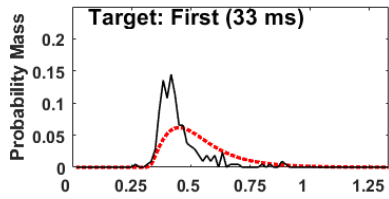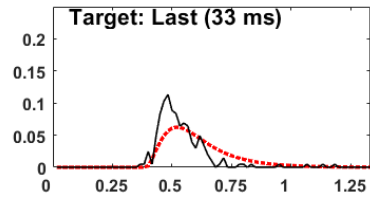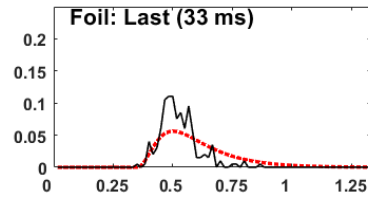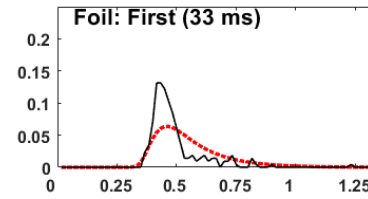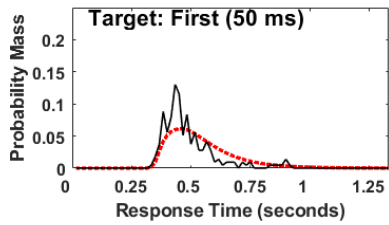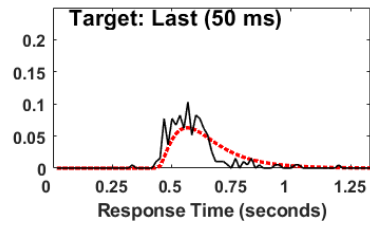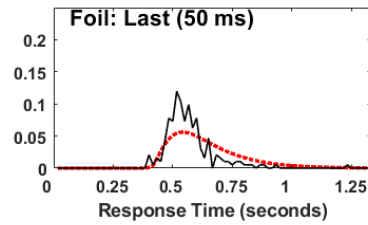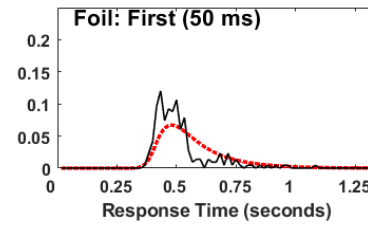

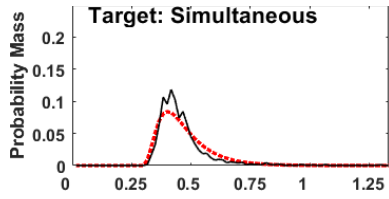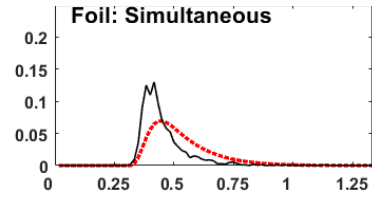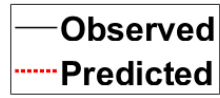

Participant A

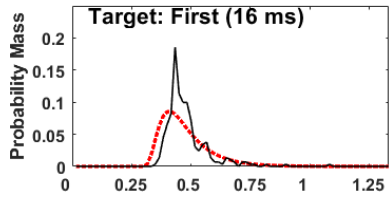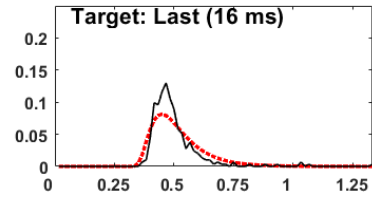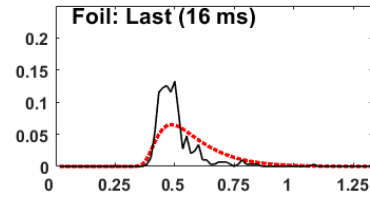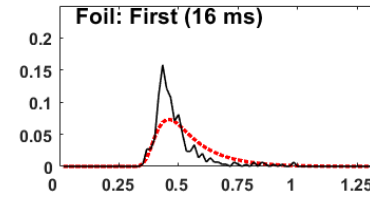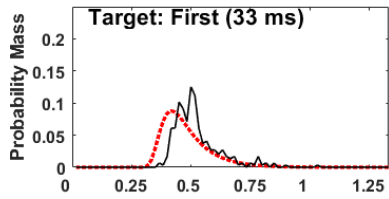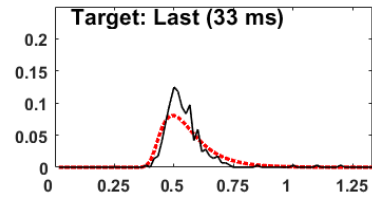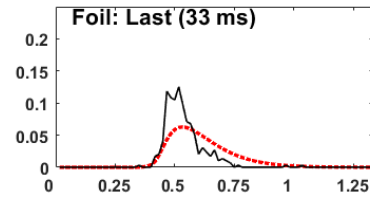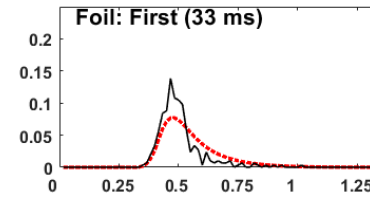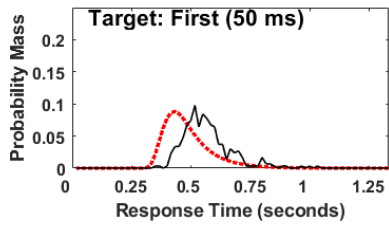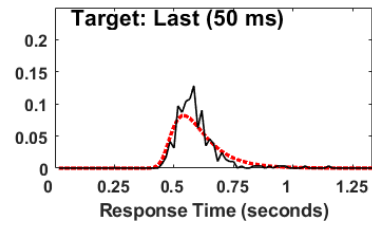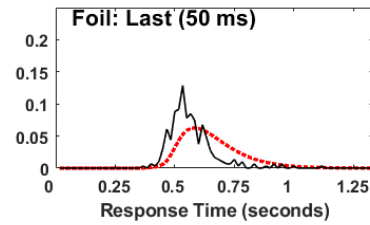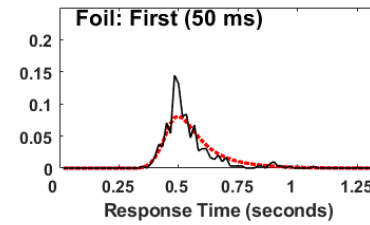

Supplement: 42113_2021_107_MOESM1_ESM.pdf [file 42113_2021_107_MOESM1_ESM.pdf]
